# Supplementary material
Source: PubMed Central journal article supplement (PMC6760392)
Supplement: jcsm.15.9.1251SD1.pdf [file jcsm.15.9.1251SD1.pdf]

**Table S1**—Association of polysomnography parameters and individual perioperative and postoperative complications.

| <b>PSG Parameters</b>                               | <b>AHI</b>    | <b>OAH1</b>   | <b>OAI</b>    | <b>ODI</b>    | <b>Lowest SaO<sub>2</sub> (%)</b> | <b>%TST O<sub>2</sub> &lt; 90%</b> | <b>Peak ETCO<sub>2</sub> (mmHg)</b> | <b>%TST ETCO<sub>2</sub> &gt; 50 mmHg</b> |
|-----------------------------------------------------|---------------|---------------|---------------|---------------|-----------------------------------|------------------------------------|-------------------------------------|-------------------------------------------|
| <b>Intraoperative period</b>                        |               |               |               |               |                                   |                                    |                                     |                                           |
| <i>Intubation Attempts</i>                          |               |               |               |               |                                   |                                    |                                     |                                           |
| 1 (n = 120)                                         | 31.61 ± 25.86 | 30.81 ± 25.74 | 10.13 ± 15.99 | 16.00 ± 19.71 | 79.17 ± 12.22                     | 4.30 ± 10.31                       | 57.40 ± 26.22                       | 2.84 ± 8.44                               |
| 2 (n = 15)                                          | 29.21 ± 21.81 | 28.82 ± 21.71 | 6.76 ± 6.78   | 9.89 ± 11.28  | 81.00 ± 10.54                     | 5.932 ± 19.71                      | 48.33 ± 6.30                        | 0.34 ± 0.94                               |
| 3 (n = 6)                                           | 33.09 ± 12.62 | 32.11 ± 12.65 | 11.50 ± 9.40  | 27.23 ± 17.57 | 68.00 ± 15.23                     | 9.50 ± 10.97                       | 63.75 ± 14.84                       | 32.30 ± 40.11                             |
| 4 (n = 1)                                           | 25.03         | 24.59         | 1.77          | 26.5          | 70.00                             | 6.00                               | N/A                                 | N/A                                       |
| <i>P</i>                                            | > .100        | > .100        | > .100        | > .100        | > .100                            | > .100                             | > .100                              | < .001                                    |
| <i>Supraglottic Obstruction</i>                     |               |               |               |               |                                   |                                    |                                     |                                           |
| No (n = 139)                                        | 31.13 ± 25.46 | 30.41 ± 25.35 | 9.57 ± 14.98  | 15.38 ± 18.96 | 79.55 ± 11.62                     | 4.24 ± 11.21                       | 3.69 ± 11.98                        | 56.46 ± 24.45                             |
| Yes (n = 7)                                         | 29.68 ± 18.79 | 29.27 ± 18.89 | 10.64 ± 18.62 | 17.63 ± 18.85 | 72.43 ± 19.93                     | 8.71 ± 13.93                       | 1.13 ± 1.96                         | 53.67 ± 10.21                             |
| <i>P</i>                                            | > .100        | > .100        | > .100        | > .100        | > .100                            | > .100                             | > .100                              | > .100                                    |
| <b>Immediate postoperative period</b>               |               |               |               |               |                                   |                                    |                                     |                                           |
| <i>Need for Supplemental Oxygen During Recovery</i> |               |               |               |               |                                   |                                    |                                     |                                           |
| No (n = 102)                                        | 32.50 ± 26.89 | 31.70 ± 26.79 | 10.66 ± 16.21 | 16.29 ± 20.29 | 79.64 ± 11.39                     | 3.22 ± 8.88                        | 55.91 ± 25.61                       | 1.51 ± 3.33                               |
| Yes (n = 49)                                        | 27.39 ± 19.42 | 26.80 ± 30.11 | 7.57 ± 11.62  | 13.55 ± 14.79 | 77.39 ± 14.08                     | 7.27 ± 14.77                       | 56.39 ± 19.32                       | 8.00 ± 19.77                              |
| <i>P</i>                                            | > .100        | > .100        | > .100        | > .100        | > .100                            | .038                               | > .100                              | .007                                      |
| <i>Desaturation During Recovery Period</i>          |               |               |               |               |                                   |                                    |                                     |                                           |
| No (n = 115)                                        | 28.77 ± 23.45 | 28.02 ± 23.25 | 8.64 ± 13.91  | 13.35 ± 17.20 | 81.49 ± 10.57                     | 2.27 ± 6.91                        | 55.69 ± 24.88                       | 1.62 ± 4.96                               |
| Yes (n = 37)                                        | 36.75 ± 27.88 | 36.08 ± 27.99 | 12.57 ± 17.44 | 21.60 ± 21.56 | 71.05 ± 13.94                     | 11.43 ± 17.64                      | 57.08 ± 19.43                       | 9.65 ± 21.44                              |
| <i>P</i>                                            | > .100        | .084          | > .100        | .019          | < .001                            | < .001                             | .002                                | > .100                                    |
| <i>Need for Oral/Nasal Airway</i>                   |               |               |               |               |                                   |                                    |                                     |                                           |
| No (n = 144)                                        | 29.99 ± 22.59 | 29.31 ± 22.45 | 9.62 ± 14.78  | 14.61 ± 16.41 | 79.24 ± 11.82                     | 4.00 ± 10.48                       | 55.88 ± 23.99                       | 3.50 ± 11.76                              |
| Yes (n = 4)                                         | 43.70 ± 50.71 | 42.08 ± 51.25 | 9.13 ± 17.69  | 28.89 ± 41.91 | 73.75 ± 19.20                     | 13.50 ± 19.29                      | 59.25 ± 12.84                       | 2.80 ± 3.63                               |
| <i>P</i>                                            | > .100        | > .100        | > .100        | .034          | > .100                            | .019                               | > .100                              | > .100                                    |

| <b>Postoperative period</b>                          |               |               |               |               |               |               |               |               |
|------------------------------------------------------|---------------|---------------|---------------|---------------|---------------|---------------|---------------|---------------|
| <i>Admission to Ward</i>                             |               |               |               |               |               |               |               |               |
| No (n = 67)                                          | 28.14 ± 25.64 | 27.39 ± 25.61 | 6.91 ± 9.47   | 16.60 ± 21.03 | 79.67 ± 12.66 | 6.04 ± 14.02  | 53.88 ± 16.99 | 5.09 ± 14.95  |
| Yes (n = 91)                                         | 32.95 ± 24.49 | 32.22 ± 24.34 | 11.44 ± 17.49 | 15.08 ± 17.41 | 78.01 ± 12.09 | 3.74 ± 9.27   | 57.75 ± 27.53 | 2.58 ± 9.05   |
| <i>P</i>                                             | > .100        | > .100        | .074          | > .100        | > .100        | > .100        | > .100        | > .100        |
| <i>Admission to PICU</i>                             |               |               |               |               |               |               |               |               |
| No (n = 125)                                         | 28.98 ± 21.92 | 28.23 ± 21.80 | 9.06 ± 15.20  | 13.59 ± 16.29 | 80.65 ± 10.96 | 2.45 ± 7.25   | 56.17 ± 25.60 | 2.81 ± 8.99   |
| Yes (n = 33)                                         | 38.49 ± 32.84 | 37.78 ± 32.78 | 11.93 ± 14.50 | 22.90 ± 24.77 | 71.67 ± 14.22 | 12.18 ± 18.11 | 56.59 ± 12.87 | 7.49 ± 20.78  |
| <i>P</i>                                             | .053          | .051          | > .100        | .012          | < .001        | < .001        | > .100        | > .100        |
| <i>Desaturation During Admission</i>                 |               |               |               |               |               |               |               |               |
| No (n = 102)                                         | 27.08 ± 18.27 | 26.30 ± 18.16 | 8.36 ± 13.19  | 12.08 ± 13.25 | 80.86 ± 10.96 | 1.97 ± 5.56   | 55.17 ± 25.84 | 1.81 ± 5.14   |
| Yes (n = 22)                                         | 39.35 ± 25.00 | 38.61 ± 24.51 | 12.70 ± 14.66 | 21.29 ± 16.07 | 71.86 ± 14.09 | 9.18 ± 12.50  | 58.00 ± 13.00 | 13.62 ± 27.09 |
| <i>P</i>                                             | .008          | .007          | > .100        | .005          | .001          | > .100        | > .100        | < .001        |
| <i>Need for Supplemental Oxygen During Admission</i> |               |               |               |               |               |               |               |               |
| No (n = 103)                                         | 27.87 ± 19.17 | 27.06 ± 19.00 | 8.84 ± 13.55  | 12.61 ± 13.23 | 80.76 ± 10.90 | 2.12 ± 5.63   | 55.14 ± 25.45 | 2.02 ± 5.41   |
| Yes (n = 21)                                         | 35.06 ± 22.87 | 34.49 ± 22.65 | 9.92 ± 13.07  | 18.38 ± 17.63 | 72.38 ± 14.88 | 8.57 ± 12.96  | 57.86 ± 14.54 | 13.12 ± 28.12 |
| <i>P</i>                                             | > .100        | > .100        | > .100        | .083          | .003          | < .001        | > .100        | .001          |

AHI = apnea-hypopnea index, ETCO<sub>2</sub> = end-tidal carbon dioxide, N/A = not applicable, OAI = obstructive apnea index, OAHl = obstructive apnea-hypopnea index, ODI = oxygen desaturation index, SpO<sub>2</sub> = saturation of oxygen, TST = total sleep time.
